# Supplementary figures and images for: Continuous glucose monitoring captures glycemic variability in obesity after sleeve gastrectomy: A prospective cohort study
Source: PubMed Central journal article supplement — Obes Sci Pract. 2024 Jan 4;10(1):e729. doi: 10.1002/osp4.729 (PMC10768733; doi:10.1002/osp4.729), 2024-01-04

Supplementary Figure 1

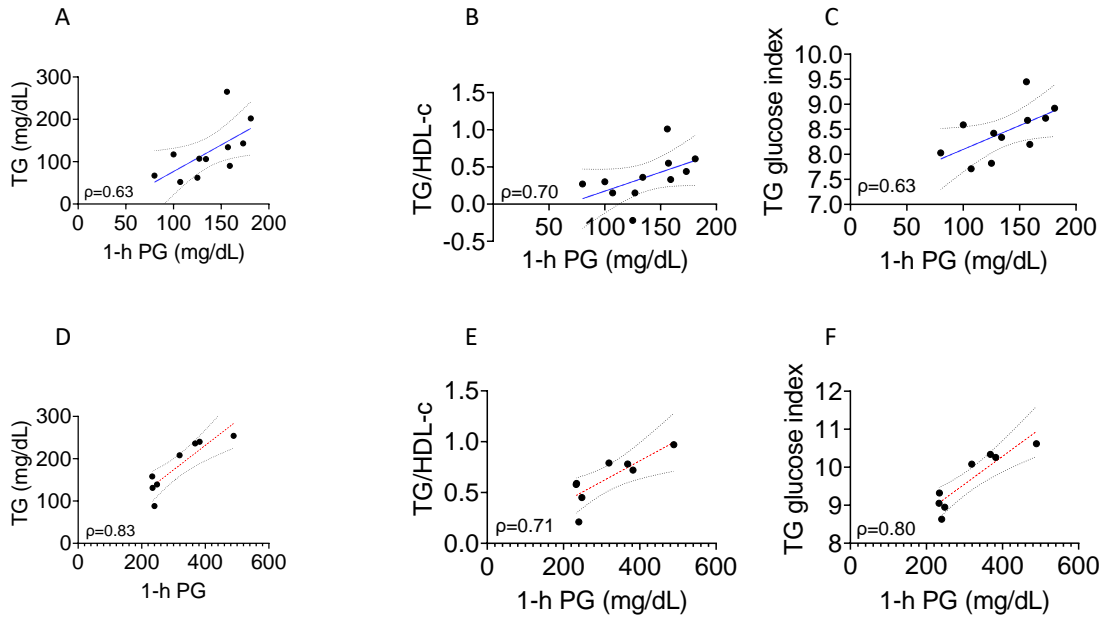

Supplement: OSP4-10-e729-s002.pdf [file OSP4-10-e729-s002.pdf]
